# Supplementary material
Source: publisher figshare collection journal article supplement (https://acs.figshare.com/ndownloader/files/4460746)
Supplement: Supplementary file 1 [file 4460746]

# Reactivity of Aluminum Cluster Anions with Water: Origins of Reactivity and Mechanisms for H<sub>2</sub> Release.

Arthur C. Reber and Shiv N. Khanna<sup>\*</sup>

Physics Department, Virginia Commonwealth University, 701 W. Grace Street,

Richmond, VA 23284-2000

Patrick J. Roach, W. Hunter Woodward, A. W. Castleman<sup>\*\*</sup>, Jr.

Departments of Chemistry and Physics, Pennsylvania State University, University Park, PA  
16802.

<sup>\*</sup>snkhanna@vcu.edu,

<sup>\*\*</sup>awc@psu.edu

**RECEIVED DATE** (to be automatically inserted after your manuscript is accepted if  
required according to the journal that you are submitting your paper to)

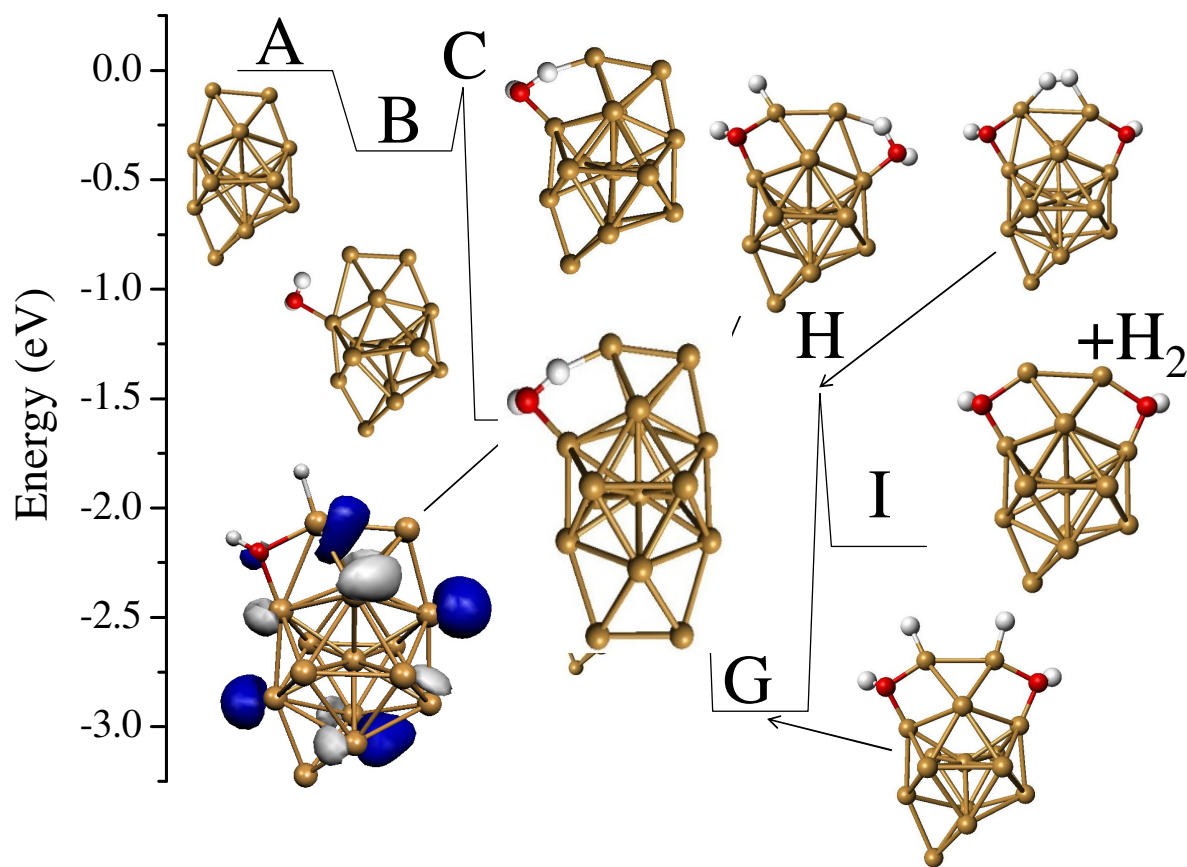

Fi

Figure S1. Reaction coordinate for the formation of  $\text{H}_2$  from  $\text{Al}_{16}^-$  and  $2\text{H}_2\text{O}$  molecules. A) is  $\text{Al}_{16}^-$ , B) is with an intact water molecule bound to the cluster, C) is the transition state for splitting the first water, D) is cluster after water is split, with the LUMO+4 charge density to show the induced Lewis acid site. E) is after the second water is bound, F) is the transition state for splitting the second water, G) is after the breaking of the second O-H bond, H) is the transition state for releasing  $\text{H}_2$ , and J) is the final cluster after  $\text{H}_2$  is released.

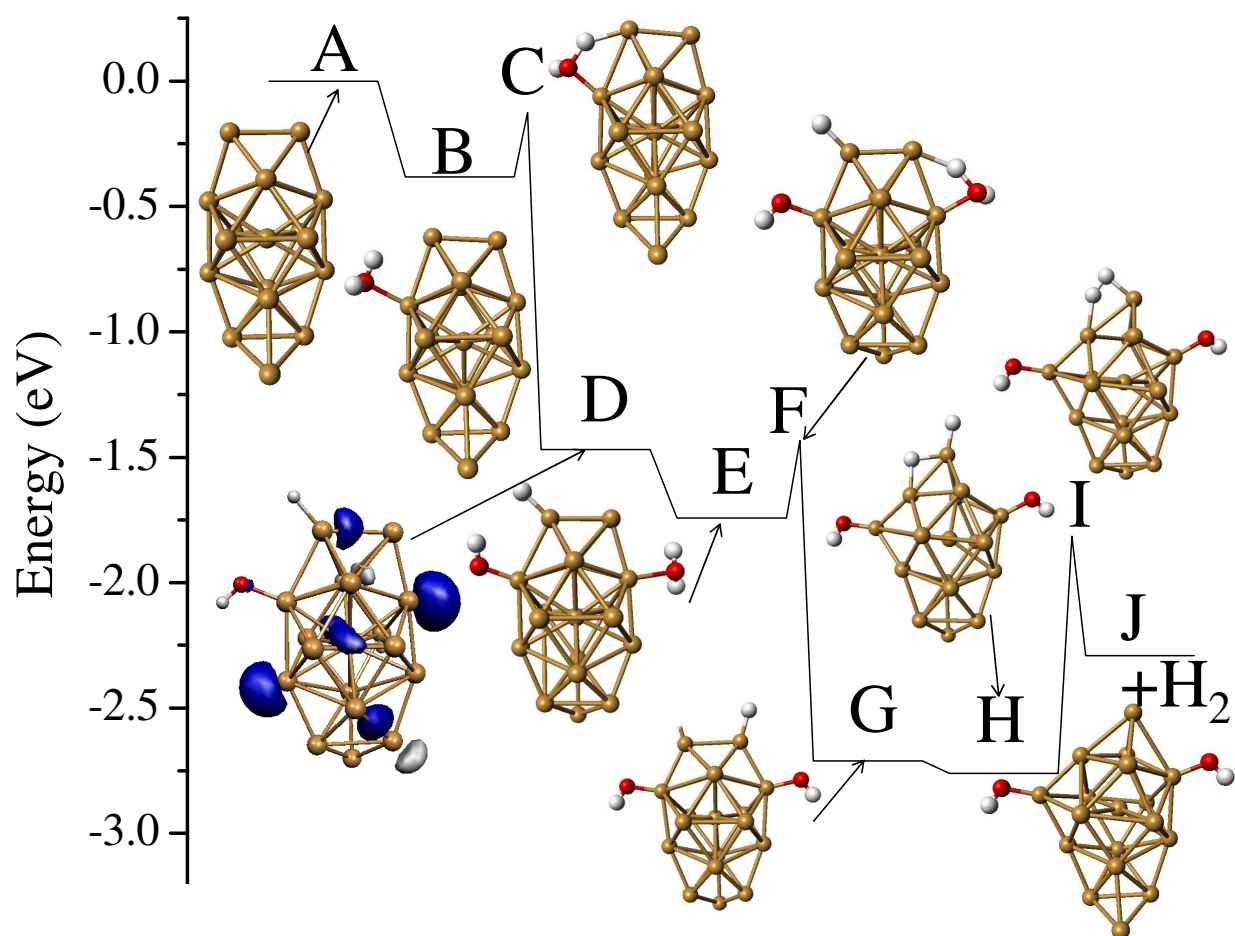

Figure S2. Reaction coordinate for the formation of  $\text{H}_2$  from  $\text{Al}_{18}^-$  and  $2\text{H}_2\text{O}$  molecules. A) is  $\text{Al}_{18}^-$ , B) is with an intact water molecule bound to the cluster, C) is the transition state for splitting the first water, D) is cluster after water is split, with the LUMO+4 charge density to show the induced Lewis acid site. E) is after the second water is bound, F) is the transition state for splitting the second water, G) is after the breaking of the second O-H bond, H) is a rearrangement of the cluster to facilitate the release of  $\text{H}_2$ , I) is the transition state for releasing  $\text{H}_2$ , and J) is the final cluster after  $\text{H}_2$  is released.
